# Supplementary material
Source: PubMed Central journal article supplement (PMC7560541)
Supplement: Supplementary_Data.pdf [file Supplementary_Data.pdf]

Table SI. The sequences of the PCR primers used in the present study.

| Gene           | Sequence, 5'-3'           |
|----------------|---------------------------|
| <i>IGF-1</i>   |                           |
| Forward        | GCTATGGCTCCAGCATTCG       |
| Reverse        | GCTCCGGAAGCAACTCAT        |
| <i>FOXO3a</i>  |                           |
| Forward        | CAACCGGCTCCTTCAACAGT      |
| Reverse        | GAGAAGGTGGCTGGTCTGTTC     |
| <i>Bim</i>     |                           |
| Forward        | GACAGTCTCAGGAGGAACCTGAA   |
| Reverse        | CCTCCTTGTGTAAGTTTCGTTGAAC |
| <i>γH2AX</i>   |                           |
| Forward        | AACAAGAAGACGCGCATCAT      |
| Reverse        | TTGAGCTCCTCGTCGTTGC       |
| $\beta$ -actin |                           |
| Forward        | GGCATCGTGATGGACTCCG       |
| Reverse        | GCTGGAAGGTGGACAGCGA       |

IGF-1, insulin-like growth factor 1; FOXO3a, forkhead box protein O3a; Bim,  $\gamma$ H2AX.
